# Supplementary material for: Safety and Efficacy of Intermediate- and Therapeutic-Dose Anticoagulation for Hospitalised Patients with COVID-19: A Systematic Review and Meta-Analysis
Source: J Clin Med. 2021 Dec 23;11(1):57. doi: 10.3390/jcm11010057 (PMC8745419; doi:10.3390/jcm11010057)
Supplement: Supplementary file 1 [file jcm-11-00057-s001.zip › jcm-1508070-supplementary.pdf]

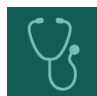

## Supplementary Materials

|                                                                                                                                                                                          |    |
|------------------------------------------------------------------------------------------------------------------------------------------------------------------------------------------|----|
| Table S1 Definition of prophylactic and therapeutic dose anticoagulation.....                                                                                                            | 2  |
| Table S2 Meta-analyses for therapeutic dose anticoagulation according to pre-specified subgroups (moderate and severe population) including certainty of evidence .....                  | 2  |
| Table S3 Prisma 2020 checklist.....                                                                                                                                                      | 4  |
| Figure S1: Forest plots of intermediate dose anticoagulation vs standard dose thromboprophylaxis                                                                                         | 6  |
| Figure S2: Forest plots according to pre-specified subgroups (moderately and severely diseased population) of therapeutic dose anticoagulation vs standard dose thromboprophylaxis ..... | 8  |
| Search strategy.....                                                                                                                                                                     | 12 |

**Table S1.** Definition of prophylactic and therapeutic dose anticoagulation.

|             | Prophylactic dose anticoagulation                                                                                                                                             | Therapeutic dose anticoagulation            |
|-------------|-------------------------------------------------------------------------------------------------------------------------------------------------------------------------------|---------------------------------------------|
| <b>LMWH</b> | Enoxaparin 40mg sc OD (4)                                                                                                                                                     | Enoxaparin 1.0 mg/kg BID (37)               |
| <b>UFH</b>  | 5000IE sc TID (4)                                                                                                                                                             | 5000IE bolus, followed by 15-20IE/kg/h (37) |
| <b>DOAC</b> | Rivaroxaban licensed neither as prophylactic- nor therapeutic-dose for treatment initiation; 20 mg for long-term treatment of DVT, PE and prophylaxis of recurrent DVT and PE | Rivaroxaban 15mg BID (37)                   |

LMWH, low molecular weight heparin; UFH, unfractionated heparin; DOAC, direct oral anticoagulant; sc, subcutaneously, OD, once daily; BID, twice daily; TID, three times daily, DVT, deep vein thrombosis, PE, pulmonary embolism.

**Table S2.** Meta-analyses for therapeutic dose anticoagulation according to pre-specified subgroups (moderate and severe population) including certainty of evidence.

| Outcome                                      | Study population*                                                                     | Risk ratio (M-H, random, 95% CI) | Risk ratio (M-H, Fixed, 95% CI) | heterogeneity                                                                               | Certainty of evidence                                                        |
|----------------------------------------------|---------------------------------------------------------------------------------------|----------------------------------|---------------------------------|---------------------------------------------------------------------------------------------|------------------------------------------------------------------------------|
| All-cause mortality at 28 days               | Moderately diseased population (WHO 4–5), 465 participants, 1 study [28]              | 0.23 [0.08, 0.67]                | 0.23 [0.08, 0.67]               | NA                                                                                          | Low-certainty evidence due to very serious imprecision                       |
|                                              | Severely diseased population (WHO 6–9), 20 participants, 1 study [24]                 | 0.33 [0.04, 2.69]                | 0.33 [0.04, 2.69]               | NA                                                                                          | Very low-certainty evidence due to risk of bias and very serious imprecision |
|                                              | Mixed population (WHO 4–9), 867 participants, 2 studies [25,29]                       | 1.07 [0.56, 2.03]                | 1.08 [0.77, 1.51]               | Tau <sup>2</sup> = 0.16; Chi <sup>2</sup> = 3.54, df = 1 (P = 0.06); I <sup>2</sup> = 72%   | Low-certainty evidence due to serious heterogeneity and imprecision          |
|                                              | Pooled effect, mixed population (WHO 4–9), 1352 participants, 4 studies [24,25,28,29] | 0.68 [0.32, 1.45]                | 0.85 [0.62, 1.16]               | Tau <sup>2</sup> = 0.38; Chi <sup>2</sup> = 11.47, df = 3 (P = 0.009); I <sup>2</sup> = 74% | Low certainty evidence due to serious heterogeneity and imprecision          |
| All-cause mortality in hospital              | Moderately diseased population (WHO 4–5), 2226 participants, 1 study [27]             | 0.89 [0.67, 1.18]                | 0.89 [0.67, 1.18]               | NA                                                                                          | NA                                                                           |
|                                              | Severely diseased population (WHO 6–9), 1118 participants 2 studies [25,26]           | 0.84 [0.37, 1.87]                | 1.03 [0.89, 1.21]               | Tau <sup>2</sup> = 0.21; Chi <sup>2</sup> = 1.84, df = 1 (P = 0.17); I <sup>2</sup> = 46%   | NA                                                                           |
|                                              | Pooled effect, mixed population (WHO 4–9), 3344 participants, 3 studies [22–24]       | 0.97 [0.79, 1.19]                | 0.99 [0.86, 1.13]               | Tau <sup>2</sup> = 0.01; Chi <sup>2</sup> = 2.78, df = 2 (P = 0.25); I <sup>2</sup> = 28%   | Low certainty evidence due to serious indirectness and risk of bias          |
| Worsening of clinical status: Progression to | Moderately diseased population (WHO 4–                                                | 0.90 [0.72, 1.14]                | 0.90 [0.72, 1.14]               | NA                                                                                          | Low certainty evidence due to serious indirectness and risk of bias          |

|                                                                                                                  |                                                                                       |                   |                     |                                                                                          |                                                                                   |  |
|------------------------------------------------------------------------------------------------------------------|---------------------------------------------------------------------------------------|-------------------|---------------------|------------------------------------------------------------------------------------------|-----------------------------------------------------------------------------------|--|
| intubation at 28 days), 2231 participants, 1 study [27]                                                          |                                                                                       |                   |                     |                                                                                          |                                                                                   |  |
| Worsening of clinical status: Progression to any mechanical ventilation or death (28 days)                       | Moderately diseased population (WHO 4–5), 465 participants, 1 study [28]              | 0.63 [0.39, 1.02] | 0.63 [0.39, 1.02]   | NA                                                                                       | Low certainty evidence due to serious imprecision                                 |  |
| Improvement of clinical status: participants discharged alive without clinical deterioration or death at 28 days | Mixed population (WHO 4–9), 614 participants, 1 study [24]                            | 0.96 [0.90, 1.02] | −0.03 [−0.09, 0.02] | NA                                                                                       | High certainty evidence                                                           |  |
| Improvement of clinical status: survival until hospital discharge without receiving organ support                | Moderately diseased population (WHO 4–5), 2219 participants, 1 study [27]             | 1.05 [1.00, 1.10] | 1.05 [1.00, 1.10]   | NA                                                                                       | Low certainty evidence due to serious indirectness and risk of bias               |  |
| Any thrombotic event or death                                                                                    | Moderately diseased population (WHO 4–5), 2396 participants, 2 studies [23,29]        | 0.64 [0.38, 1.07] | 0.72 [0.57, 0.91]   | Chi <sup>2</sup> = 2.90, df = 1 (P = 0.09); I <sup>2</sup> = 66%                         | Low-certainty evidence due to serious risk of bias and indirectness/heterogeneity |  |
|                                                                                                                  | Severely diseased population (WHO 6–9), 1174 participants, 2 studies [22,29]          | 0.98 [0.86, 1.12] | 0.98 [0.86, 1.12]   | Chi <sup>2</sup> = 0.09, df = 1 (P = 0.77); I <sup>2</sup> = 0%                          | Low-certainty evidence due to serious risk of bias and indirectness               |  |
|                                                                                                                  | Mixed population (WHO 4–9), 614 participants, 1 study [25]                            | 1.03 [0.70, 1.50] | 1.03 [0.70, 1.50]   | NA                                                                                       | Low-certainty evidence due to serious risk of bias and imprecision                |  |
|                                                                                                                  | Pooled effect, mixed population (WHO 4–9), 4184 participants, 4 studies [22,23,25,29] | 0.86 [0.71, 1.06] | 0.90 [0.80, 1.01]   | Chi <sup>2</sup> = 8.61, df = 4 (P = 0.07); I <sup>2</sup> = 54%                         | Low certainty evidence due to serious risk of bias and indirectness/heterogeneity |  |
|                                                                                                                  | Moderately diseased population (WHO 4–5), 2691 participants, 2 studies [27,28]        | 0.47 [0.27, 0.83] | 0.47 [0.27, 0.82]   | Tau <sup>2</sup> = 0.00; Chi <sup>2</sup> = 0.39, df = 1 (P = 0.53); I <sup>2</sup> = 0% | NA                                                                                |  |
| Any thrombotic event                                                                                             | Severely diseased population (WHO 6–9), 1109 participants, 2 studies [25,26]          | 0.66 [0.45, 0.96] | 0.66 [0.45, 0.96]   | Tau <sup>2</sup> = 0.00; Chi <sup>2</sup> = 0.23, df = 1 (P = 0.63); I <sup>2</sup> = 0% | NA                                                                                |  |

|                           |                                                                                          |                   |                   |                                                                                           |                                                                     |
|---------------------------|------------------------------------------------------------------------------------------|-------------------|-------------------|-------------------------------------------------------------------------------------------|---------------------------------------------------------------------|
| Major bleeding at 28 days | Mixed population (WHO 4–9), 869 participants, 2 studies [24,29]                          | 0.54 [0.28, 1.05] | 0.55 [0.38, 0.80] | Tau <sup>2</sup> = 0.16; Chi <sup>2</sup> = 3.03, df = 1 (P = 0.08); I <sup>2</sup> = 67% | NA                                                                  |
|                           | Pooled effect, mixed population (WHO 4–9), 4669 participants, 6 studies [22–25,28,29]    | 0.58 [0.45, 0.74] | 0.57 [0.45, 0.73] | Tau <sup>2</sup> = 0.00; Chi <sup>2</sup> = 4.68, df = 5 (P = 0.46); I <sup>2</sup> = 0%  | Moderate certainty evidence due to serious risk of bias             |
|                           | Moderately diseased population (WHO 4–5), 2397 participants, 2 studies [27,29]           | 1.96 [0.96, 4.01] | 1.97 [0.97, 4.02] | Tau <sup>2</sup> = 0.00; Chi <sup>2</sup> = 0.50, df = 1 (P = 0.48); I <sup>2</sup> = 0%  | NA                                                                  |
|                           | Severely diseased population (WHO 6–9), 1174 participants, 2 studies [26,29]             | 1.85 [0.81, 4.23] | 1.88 [0.97, 3.64] | Tau <sup>2</sup> = 0.07; Chi <sup>2</sup> = 1.06, df = 1 (P = 0.30); I <sup>2</sup> = 6%  | NA                                                                  |
|                           | Mixed population (WHO 4–9), 1079 participants, 2 studies [24,28]                         | 1.28 [0.29, 5.75] | 1.50 [0.62, 3.66] | Tau <sup>2</sup> = 0.66; Chi <sup>2</sup> = 2.22, df = 1 (P = 0.14); I <sup>2</sup> = 55% | NA                                                                  |
|                           | Pooled effect, mixed population (WHO 4–9), 4650 participants, 5 studies [22,23,25,28,29] | 1.78 [1.15, 2.74] | 1.82 [1.19, 2.78] | Tau <sup>2</sup> = 0.00; Chi <sup>2</sup> = 3.95, df = 5 (P = 0.56); I <sup>2</sup> = 0%  | Low certainty evidence due to serious indirectness and risk of bias |

M-H, Mantel-Haenszel; CI, confidence interval. \* Patient status according to WHO clinical progression scale

**Table S3.** PRISMA 2020 checklist.

| Section and Topic       | Item # | Checklist item                                                                                                                                                                                                                                                                                       | Location where item is reported |
|-------------------------|--------|------------------------------------------------------------------------------------------------------------------------------------------------------------------------------------------------------------------------------------------------------------------------------------------------------|---------------------------------|
| <b>TITLE</b>            |        |                                                                                                                                                                                                                                                                                                      |                                 |
| Title                   | 1      | Identify the report as a systematic review.                                                                                                                                                                                                                                                          | Title                           |
| <b>ABSTRACT</b>         |        |                                                                                                                                                                                                                                                                                                      |                                 |
| Abstract                | 2      | See the PRISMA 2020 for Abstracts checklist.                                                                                                                                                                                                                                                         | Abstract                        |
| <b>INTRODUCTION</b>     |        |                                                                                                                                                                                                                                                                                                      |                                 |
| Rationale               | 3      | Describe the rationale for the review in the context of existing knowledge.                                                                                                                                                                                                                          | 1                               |
| Objectives              | 4      | Provide an explicit statement of the objective(s) or question(s) the review addresses.                                                                                                                                                                                                               | 1                               |
| <b>METHODS</b>          |        |                                                                                                                                                                                                                                                                                                      |                                 |
| Eligibility criteria    | 5      | Specify the inclusion and exclusion criteria for the review and how studies were grouped for the syntheses.                                                                                                                                                                                          | 2.1                             |
| Information sources     | 6      | Specify all databases, registers, websites, organisations, reference lists and other sources searched or consulted to identify studies. Specify the date when each source was last searched or consulted.                                                                                            | 2.2                             |
| Search strategy         | 7      | Present the full search strategies for all databases, registers and websites, including any filters and limits used.                                                                                                                                                                                 | Supplementary materials         |
| Selection process       | 8      | Specify the methods used to decide whether a study met the inclusion criteria of the review, including how many reviewers screened each record and each report retrieved, whether they worked independently, and if applicable, details of automation tools used in the process.                     | 2.3                             |
| Data collection process | 9      | Specify the methods used to collect data from reports, including how many reviewers collected data from each report, whether they worked independently, any processes for obtaining or confirming data from study investigators, and if applicable, details of automation tools used in the process. | 2.3                             |
| Data items              | 10a    | List and define all outcomes for which data were sought. Specify whether all results that were compatible with each outcome domain in each study were sought (e.g. for all measures, time points, analyses), and if not, the methods used to decide which results to collect.                        | 2.1; 2.3                        |

| Section and Topic                              | Item # | Checklist item                                                                                                                                                                                                                                                                       | Location where item is reported |
|------------------------------------------------|--------|--------------------------------------------------------------------------------------------------------------------------------------------------------------------------------------------------------------------------------------------------------------------------------------|---------------------------------|
|                                                | 10b    | List and define all other variables for which data were sought (e.g. participant and intervention characteristics, funding sources). Describe any assumptions made about any missing or unclear information.                                                                         | 2.3                             |
| Study risk of bias assessment                  | 11     | Specify the methods used to assess risk of bias in the included studies, including details of the tool(s) used, how many reviewers assessed each study and whether they worked independently, and if applicable, details of automation tools used in the process.                    | 2.3                             |
| Effect measures                                | 12     | Specify for each outcome the effect measure(s) (e.g. risk ratio, mean difference) used in the synthesis or presentation of results.                                                                                                                                                  | 2.3                             |
| Synthesis methods                              | 13a    | Describe the processes used to decide which studies were eligible for each synthesis (e.g. tabulating the study intervention characteristics and comparing against the planned groups for each synthesis (item #5)).                                                                 | 2.3                             |
|                                                | 13b    | Describe any methods required to prepare the data for presentation or synthesis, such as handling of missing summary statistics, or data conversions.                                                                                                                                | 2.3                             |
|                                                | 13c    | Describe any methods used to tabulate or visually display results of individual studies and syntheses.                                                                                                                                                                               | 2.3                             |
|                                                | 13d    | Describe any methods used to synthesize results and provide a rationale for the choice(s). If meta-analysis was performed, describe the model(s), method(s) to identify the presence and extent of statistical heterogeneity, and software package(s) used.                          | 2.3                             |
|                                                | 13e    | Describe any methods used to explore possible causes of heterogeneity among study results (e.g. subgroup analysis, meta-regression).                                                                                                                                                 | 2.3                             |
|                                                | 13f    | Describe any sensitivity analyses conducted to assess robustness of the synthesized results.                                                                                                                                                                                         | 2.3                             |
| Reporting bias assessment                      | 14     | Describe any methods used to assess risk of bias due to missing results in a synthesis (arising from reporting biases).                                                                                                                                                              | 2.3                             |
| Certainty assessment                           | 15     | Describe any methods used to assess certainty (or confidence) in the body of evidence for an outcome.                                                                                                                                                                                | 2.3                             |
| RESULTS                                        |        |                                                                                                                                                                                                                                                                                      |                                 |
| Study selection                                | 16a    | Describe the results of the search and selection process, from the number of records identified in the search to the number of studies included in the review, ideally using a flow diagram.                                                                                         | 3                               |
|                                                | 16b    | Cite studies that might appear to meet the inclusion criteria, but which were excluded, and explain why they were excluded.                                                                                                                                                          | 3; PRISMA flow chart            |
| Study characteristics                          | 17     | Cite each included study and present its characteristics.                                                                                                                                                                                                                            | 3.1; table 1                    |
| Risk of bias in studies                        | 18     | Present assessments of risk of bias for each included study.                                                                                                                                                                                                                         | 3.2                             |
| Results of individual studies                  | 19     | For all outcomes, present, for each study: (a) summary statistics for each group (where appropriate) and (b) an effect estimate and its precision (e.g. confidence/credible interval), ideally using structured tables or plots.                                                     | 3.3; 3.4; Table 2 & 3           |
| Results of syntheses                           | 20a    | For each synthesis, briefly summarise the characteristics and risk of bias among contributing studies.                                                                                                                                                                               | 3.3; 3.4                        |
|                                                | 20b    | Present results of all statistical syntheses conducted. If meta-analysis was done, present for each the summary estimate and its precision (e.g. confidence/credible interval) and measures of statistical heterogeneity. If comparing groups, describe the direction of the effect. | 3.3; 3.4; Table 2 & 3           |
|                                                | 20c    | Present results of all investigations of possible causes of heterogeneity among study results.                                                                                                                                                                                       | /                               |
|                                                | 20d    | Present results of all sensitivity analyses conducted to assess the robustness of the synthesized results.                                                                                                                                                                           | Table 2 & 3                     |
| Reporting biases                               | 21     | Present assessments of risk of bias due to missing results (arising from reporting biases) for each synthesis assessed.                                                                                                                                                              | 3.2; supplementary materials    |
| Certainty of evidence                          | 22     | Present assessments of certainty (or confidence) in the body of evidence for each outcome assessed.                                                                                                                                                                                  | 3.3; 3.4                        |
| DISCUSSION                                     |        |                                                                                                                                                                                                                                                                                      |                                 |
| Discussion                                     | 23a    | Provide a general interpretation of the results in the context of other evidence.                                                                                                                                                                                                    | 4                               |
|                                                | 23b    | Discuss any limitations of the evidence included in the review.                                                                                                                                                                                                                      | 4                               |
|                                                | 23c    | Discuss any limitations of the review processes used.                                                                                                                                                                                                                                | 4                               |
|                                                | 23d    | Discuss implications of the results for practice, policy, and future research.                                                                                                                                                                                                       | 4                               |
| OTHER INFORMATION                              |        |                                                                                                                                                                                                                                                                                      |                                 |
| Registration and protocol                      | 24a    | Provide registration information for the review, including register name and registration number, or state that the review was not registered.                                                                                                                                       | 2                               |
|                                                | 24b    | Indicate where the review protocol can be accessed, or state that a protocol was not prepared.                                                                                                                                                                                       | 2                               |
|                                                | 24c    | Describe and explain any amendments to information provided at registration or in the protocol.                                                                                                                                                                                      | 2.1                             |
| Support                                        | 25     | Describe sources of financial or non-financial support for the review, and the role of the funders or sponsors in the review.                                                                                                                                                        | acknowledgements                |
| Competing interests                            | 26     | Declare any competing interests of review authors.                                                                                                                                                                                                                                   | acknowledgements                |
| Availability of data, code and other materials | 27     | Report which of the following are publicly available and where they can be found: template data collection forms; data extracted from included studies; data used for all analyses; analytic code; any other materials used in the review.                                           | acknowledgements                |

**Figure S1.** Forest plots of intermediate dose anticoagulation vs standard dose thromboprophylaxis for the outcomes (1) all-cause mortality at 30 days, (2) all-cause mortality at 90 days, (3) any thrombotic event or death, (4) any thrombotic event at 30 days and (5) major bleeding at 30 days. Risk of Bias assessment graded as ●, no concern in according domain; ●, some concern in according domain

### Comparison 2: JCM - Anticoagulation: intermediate dose anticoagulation versus standard thromboprophylaxis (low dose), Outcome 1: All-cause mortality (30 days)

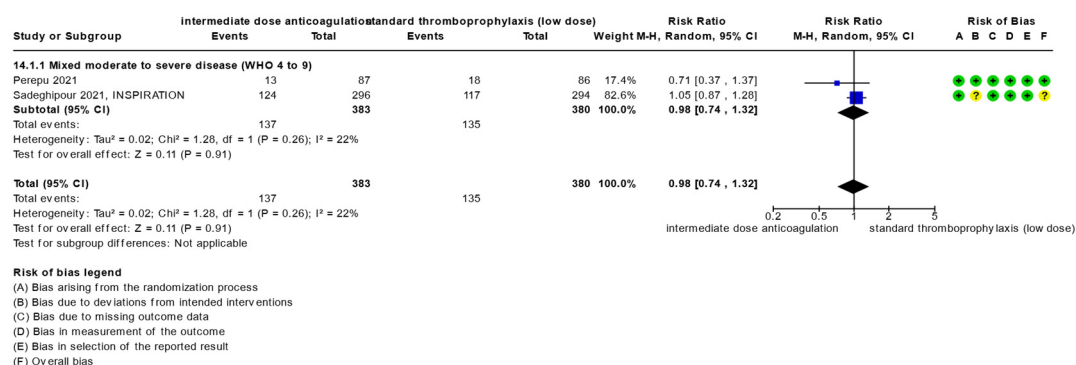

### Comparison 2: JCM - Anticoagulation: intermediate dose anticoagulation versus standard thromboprophylaxis (low dose), Outcome 2: All-cause mortality (90 days)

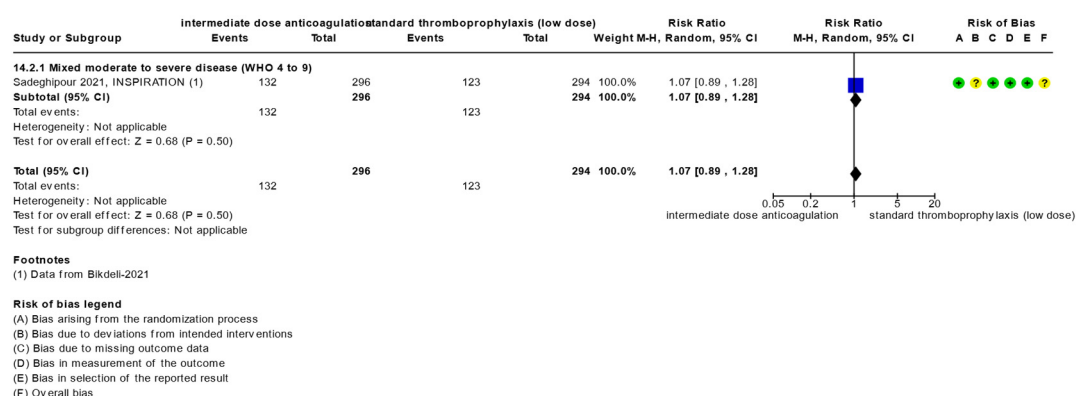

### Comparison 2: JCM - Anticoagulation: intermediate dose anticoagulation versus standard thromboprophylaxis (low dose), Outcome 3: Any thrombotic event (venous or arterial thrombosis) or death (within 30 days)

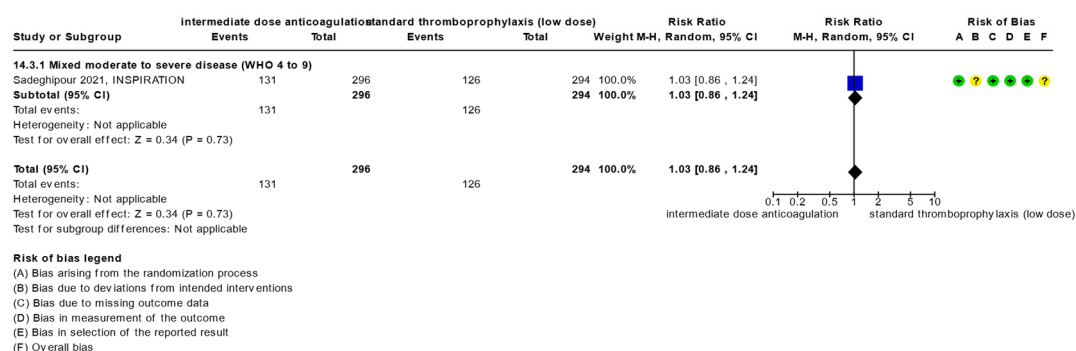

### Comparison 2: JCM - Anticoagulation: intermediate dose anticoagulation versus standard thromboprophylaxis (low dose), Outcome 4: Any venous thrombotic event (30 days)

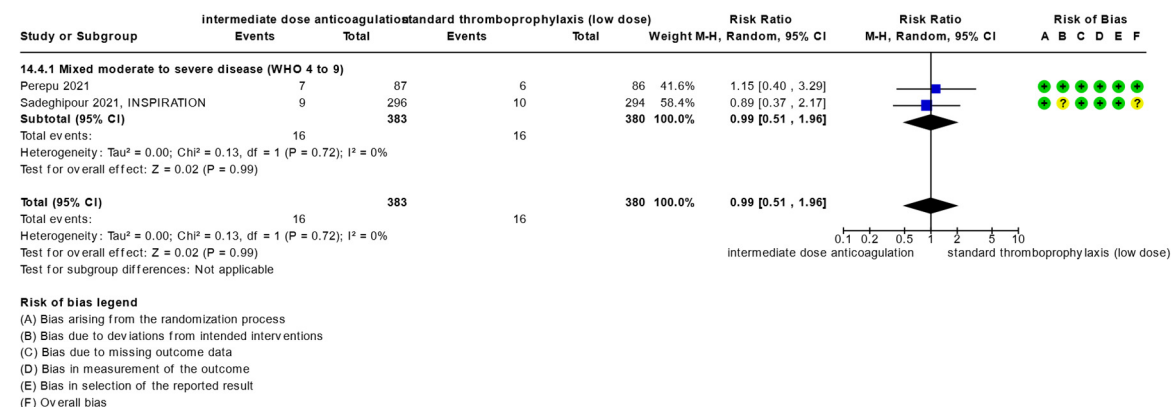

### Comparison 2: JCM - Anticoagulation: intermediate dose anticoagulation versus standard thromboprophylaxis (low dose), Outcome 5: Major bleeding up to 30 days

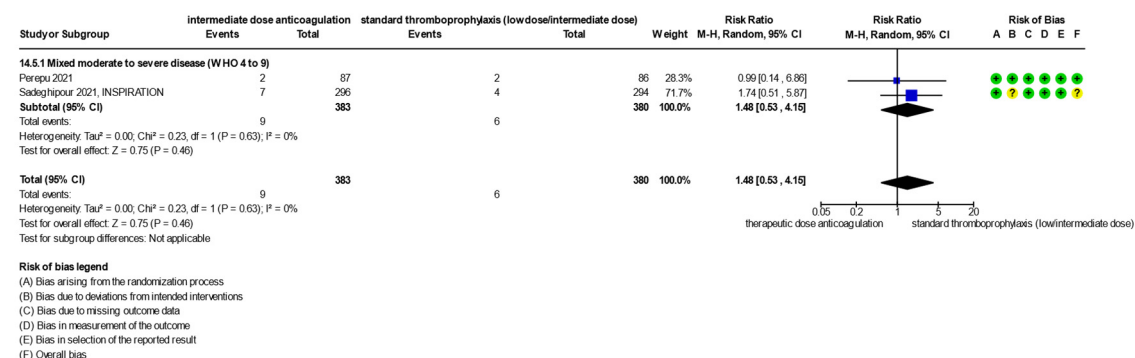

**Figure S2.** Forest plots according to pre-specified subgroups (moderately and severely diseased population) of therapeutic dose anticoagulation vs standard dose thromboprophylaxis for the outcomes (1) all-cause mortality at 28-30 days, (2) all-cause mortality in hospital, (3) worsening of clinical status: progression to intubation or death at 28 days, (4) clinical worsening: progression to any mechanical ventilation or death at 28 days, (5) improvement of clinical status: participants discharged alive, (6) improvement of clinical status: survival until hospital discharge without receiving organ support, (7) any thrombotic event or death at 28 to 30 days, (8) any thrombotic event at 28-30 days and (9) major bleeding (ISTH) during treatment/up to 30 days. Risk of Bias assessment graded as ●, no concern in according domain; ? some concern in according domain

### Comparison 1: JCM - Anticoagulation: therapeutic versus standard thromboprophylaxis (low dose/intermediate dose), Outcome 1: All-cause mortality (28 to 30 days)

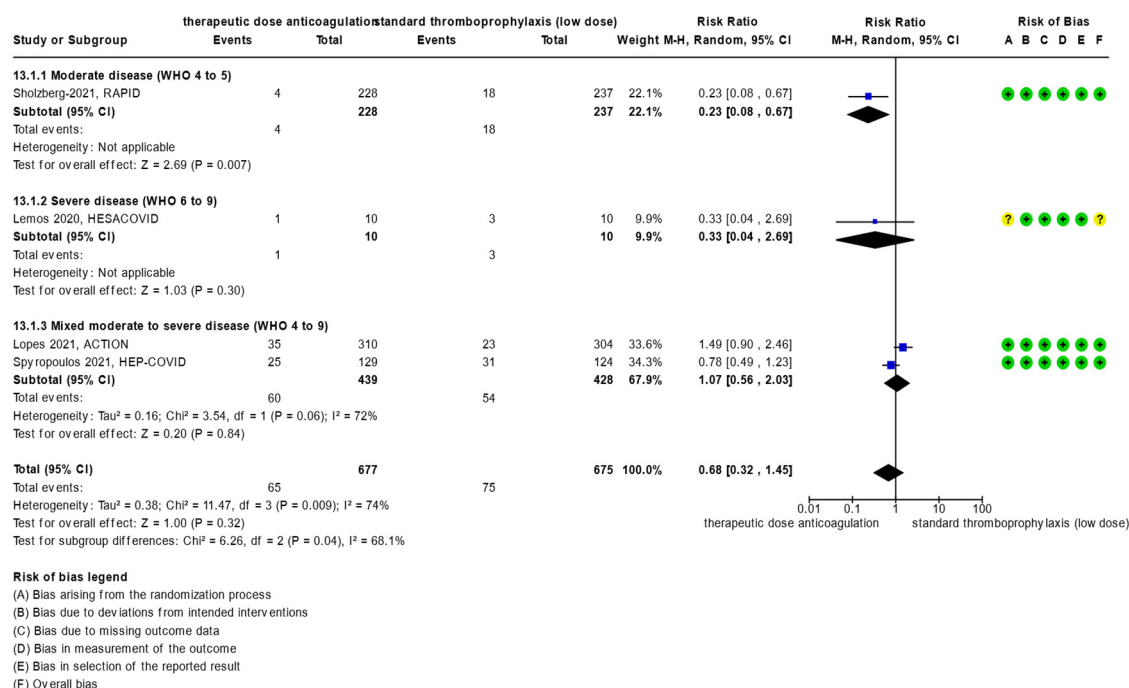

### Comparison 1: JCM - Anticoagulation: therapeutic versus standard thromboprophylaxis (low dose/intermediate dose), Outcome 2: All-cause mortality (in hospital)

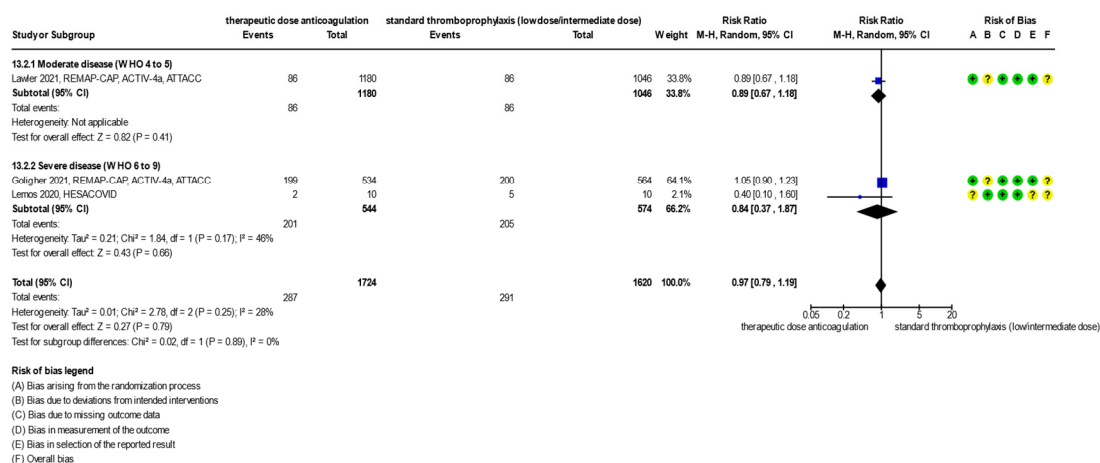

### Comparison 1: JCM - Anticoagulation: therapeutic versus standard thromboprophylaxis (low dose/intermediate dose), Outcome 3: Worsening of clinical status: Progression to intubation or death (28 days)

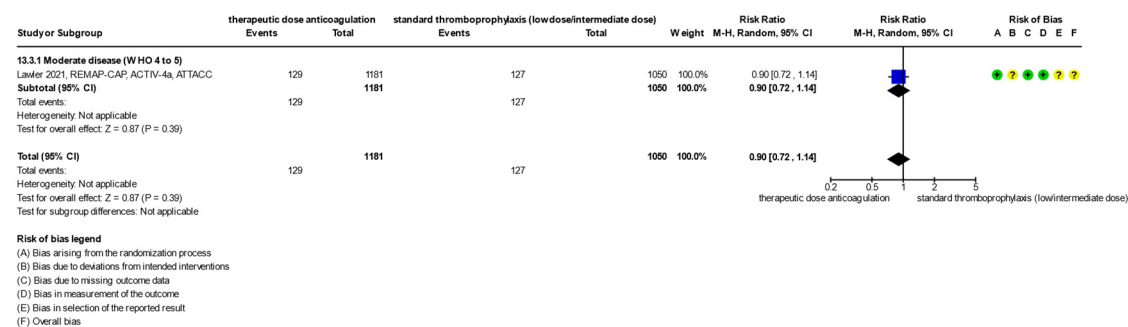

### Comparison 1: JCM - Anticoagulation: therapeutic versus standard thromboprophylaxis (low dose/intermediate dose), Outcome 4: Worsening of clinical status: Progression to any mechanical ventilation or death (28 days)

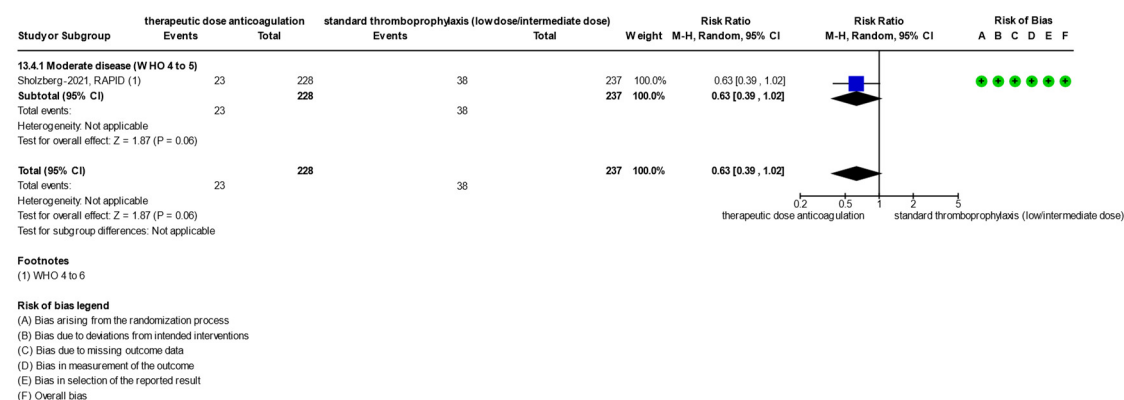

### Comparison 1: JCM - Anticoagulation: therapeutic versus standard thromboprophylaxis (low dose/intermediate dose), Outcome 5: Improvement of clinical status: Participants discharged alive without clinical deterioration or death

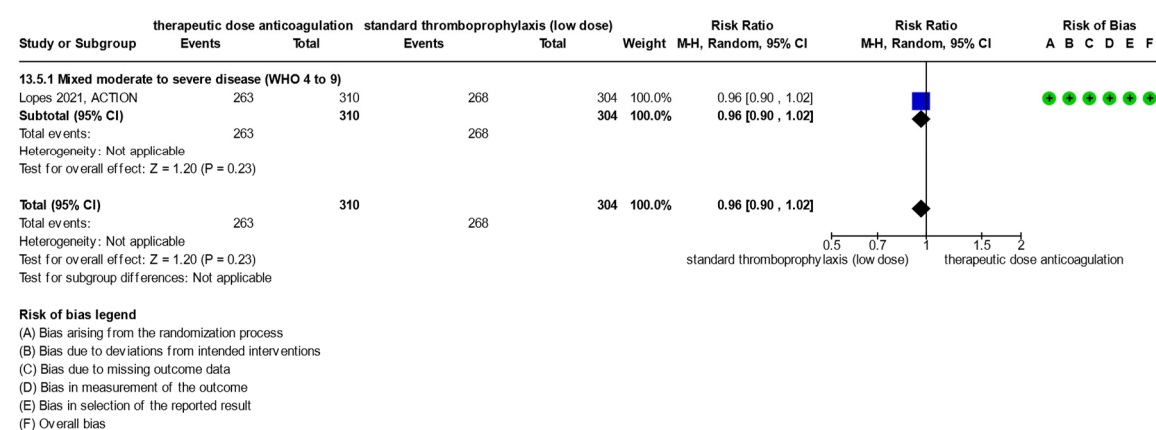

### Comparison 1: JCM - Anticoagulation: therapeutic versus standard thromboprophylaxis (low dose/intermediate dose), Outcome 6: Improvement of clinical status: Survival until hospital discharge without receiving organ support

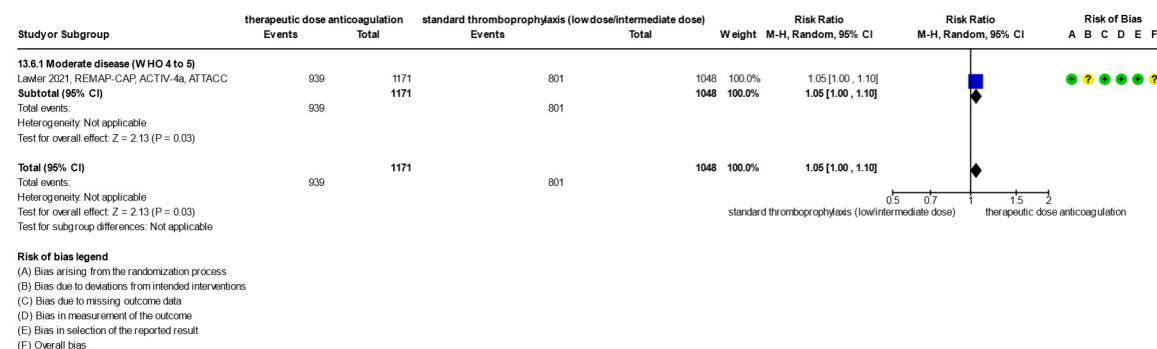

### Comparison 1: JCM - Anticoagulation: therapeutic versus standard thromboprophylaxis (low dose/intermediate dose), Outcome 7: Any thrombotic event or death (28 to 30 days)

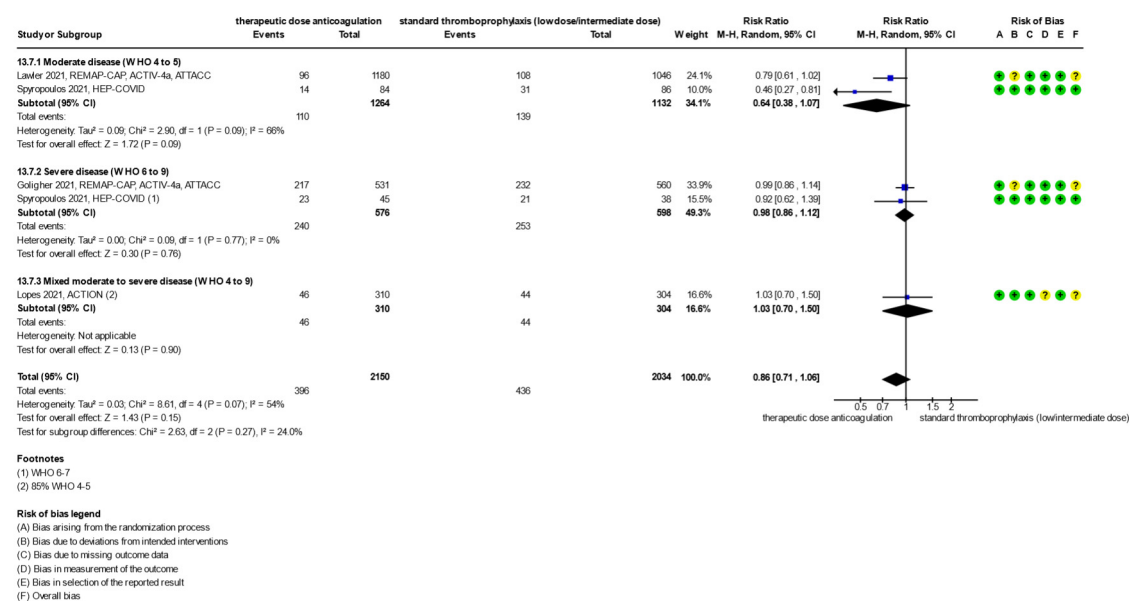

### Comparison 1: JCM - Anticoagulation: therapeutic versus standard thromboprophylaxis (low dose/intermediate dose), Outcome 8: Any thrombotic event (28 to 30 days)

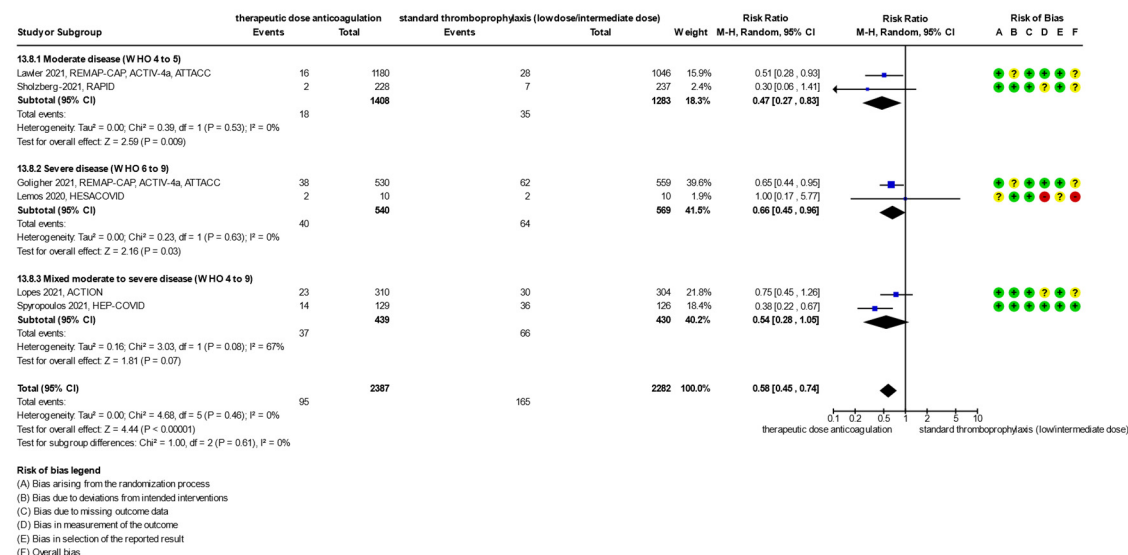

### Comparison 1: JCM - Anticoagulation: therapeutic versus standard thromboprophylaxis (low dose/intermediate dose), Outcome 9: Major bleeding (ISTH) during treatment/up to 30 days

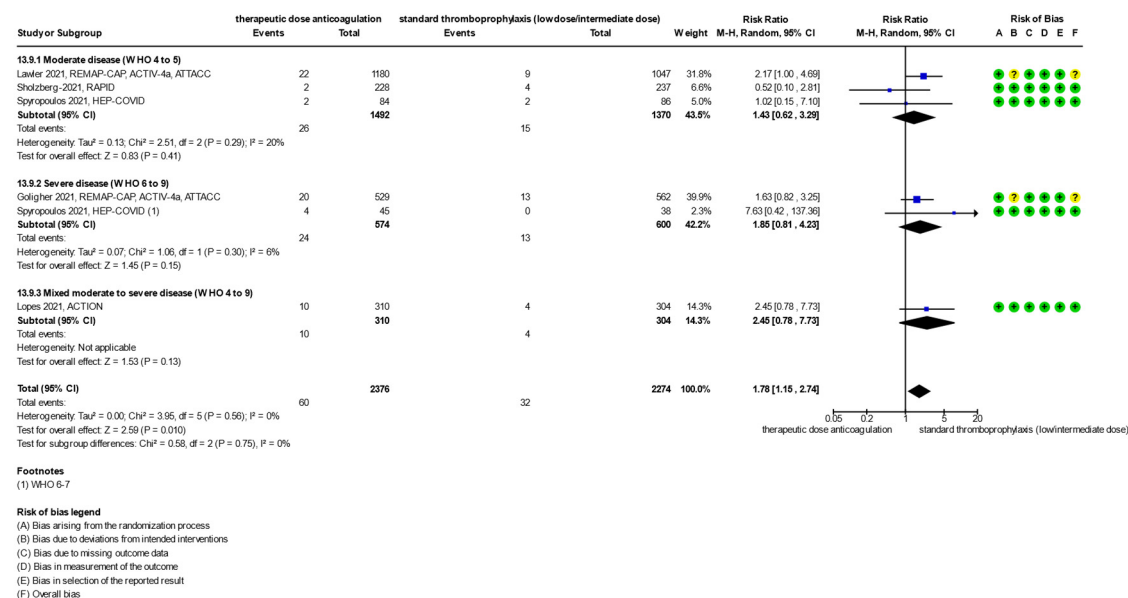

## Search strategy

All searches were conducted on 24 September 2021 and deduplicated using EndNote X8.

**Cochrane COVID-19 Study Register** (<https://covid-19.cochrane.org>)

### Search string:

anticoagula\* OR antithromb\* OR "Thrombin Inhibitor" OR "Thrombin Inhibitors" OR Dabigatran OR Pradaxa OR Argatroban OR Novastan OR Acova OR Lepirudin OR Refludan OR Desirudin OR Iprivask OR Revasc OR desulfatohirudin\* OR "recombinant HV1 hirudin" OR Bivalirudin OR Hirulog\* OR Angiomax OR Angiox OR "Xa inhibitor" OR "Xa inhibitors" OR Xaban\* OR Rivaroxaban OR Xarelto OR Apixaban OR Eliquis OR Edoxaban OR Lixiana OR Savaysa OR coumar\* OR cumar\* OR kumar\* OR Benzopyrone\* OR Benzopyran\* OR Hydroxycinnamic OR "Tonka bean camphor" OR "Vitamin K antagonist" OR "Vitamin K antagonists" OR phenprocoumon\* OR henylpropylhydroxycumarin\* OR Falithrom OR Fencumar OR Fenprocoumon\* OR Liquamar OR Marcoumar OR Marcumar OR Phenprogramma OR Warfarin\* OR Warfarat OR Aldocumar OR Warfant OR Brumolin OR Coumefene OR Dethmor OR Dethnel OR Kypfarin OR Marevan OR Panwarfin OR Prothromadin OR Tedicumar OR Zoocoumarin OR Heparin\* OR Liquaemin OR Adomiparin OR Ardeparin OR Arteven OR Bemiparin\* OR Certoparin OR Clexane OR Klexane OR Clivarin\* OR Dalteparin OR Eparina OR Fluxum OR "Fragmin A" OR "Fragmin B" OR Fraxiparin OR Hepathrom OR "Lipo-hepin" OR Liquemin OR Multiparin OR Nadroparin\* OR Novoheparin OR Octaparin OR Pabyrin OR Parnaparin\* OR Parvoparin OR Pularin OR Reviparin OR Sandoparin OR Semuloparin OR Subeparin OR Sublingula OR Thromboliquine OR Tinzaparin\* OR Triofiban OR Vetren OR "Vitrum AB" OR UFH OR LMWH OR Alphaparin\* OR "Mono-Embolex" OR Enoxaparin\* OR Lovenox OR Danaparoid OR Danaproid OR Orgaran OR Lomoparan OR Fondaparinux OR Penta OR Quixidar OR Arixtra OR sulodexid\* OR Aterina OR Luzone OR "glucuronyl glucosamine glycan sulfate" OR "glucuronyl glucosaminoglycan sulfate" OR Dociparastat

### Study characteristics:

- 1) "Intervention assignment": "Randomised" OR "quasi-randomised" or "unclear" OR
  - 2) "Study type": "Interventional" AND "Study design": "Parallel/Crossover"
  - 3) "Study type": "Interventional" AND "Study design": "Unclear"
  - 4) "Study type": "Adaptive/Platform"
- = 245 studies (431 references)

### Clarivate Web of Science Core Collection (Advanced search)

#1

TI=(anticoagula\* OR antithromb\* OR "Thrombin Inhibitor\*" OR Dabigatran OR Pradaxa OR Argatroban OR Novastan OR Acova OR Lepirudin OR Refludan OR Desirudin OR Iprivask OR Revasc OR desulfatohirudin\* OR "recombinant HV1 hirudin" OR Bivalirudin OR Hirulog\* OR Angiomax OR Angiox OR "Xa inhibitor\*" OR Xaban\* OR Rivaroxaban OR Xarelto OR Apixaban OR Eliquis OR Edoxaban OR Lixiana OR Savaysa OR coumar\* OR cumar\* OR kumar\* OR Benzopyrone\* OR Benzopyran\* OR Hydroxycinnamic OR "Tonka bean camphor" OR "Vitamin K antagonist" OR "Vitamin K antagonists" OR phenprocoumon\* OR henylpropylhydroxycumarin\* OR Falithrom OR Fencumar OR Fenprocoumon\* OR Liquamar OR Marcoumar OR Marcumar OR Phenprogramma OR Warfarin\* OR Warfarat OR Aldocumar OR Warfant OR Brumolin OR Coumefene OR Dethmor OR Dethnel OR Kypfarin OR Marevan OR Panwarfin OR Prothromadin OR Tedicumar OR Zoocoumarin OR Heparin\* OR Liquaemin OR Adomiparin OR Ardeparin OR Arteven OR Bemiparin\* OR Certoparin OR Clexane OR Klexane OR Clivarin\* OR Dalteparin OR Eparina OR Fluxum OR "Fragmin A" OR "Fragmin B" OR Fraxiparin OR Hepathrom OR "Lipo-hepin" OR Liquemin OR Multiparin

OR Nadroparin\* OR Novoheparin OR Octaparin OR Pabyrin OR Parnaparin\* OR Parvoparin OR Pularin OR Reviparin OR Sandoparin OR Semuloparin OR Subeparin OR Sublingula OR Thromboliquine OR Tinzaparin\* OR Triofiban OR Vetren OR "Vitrum AB" OR UFH OR LMWH OR Alphaparin\* OR "Mono-Embolex" OR Enoxaparin\* OR Lovenox OR Danaparoid OR Danaproid OR Orgaran OR Lomoparan OR Fondaparinux OR Penta OR Quixidar OR Arixtra OR sulodexid\* OR Aterina OR Luzone OR "glucuronyl glucosamine glycan sulfate" OR "glucuronyl glucosaminoglycan sulfate" OR Dociparastat) OR AB=(anticoagula\* OR antithromb\* OR "Thrombin Inhibitor\*" OR Dabigatran OR Pradaxa OR Argatroban OR Novastan OR Acova OR Lepirudin OR Refludan OR Desirudin OR Iprivask OR Revasc OR desulfatohirudin\* OR "recombinant HV1 hirudin" OR Bivalirudin OR Hirulog\* OR Angiomax OR Angiox OR "Xa inhibitor\*" OR Xaban\* OR Rivaroxaban OR Xarelto OR Apixaban OR Eliquis OR Edoxaban OR Lixiana OR Savaysa OR coumar\* OR cumar\* OR kumar\* OR Benzopyrone\* OR Benzopyran\* OR Hydroxycinnamic OR "Tonka bean camphor" OR "Vitamin K antagonist" OR "Vitamin K antagonists" OR phenprocoumon\* OR henylpropylhydroxycoumarin\* OR Falithrom OR Fencumar OR Fenprocoumon\* OR Liquamar OR Marcoumar OR Marcumar OR Phenprogramma OR Warfarin\* OR Warfarat OR Aldocumar OR Warfant OR Brumolin OR Coumefene OR Dethmor OR Dethnel OR Kypfarin OR Marevan OR Panwarfin OR Prothromadin OR Tedicumar OR Zoocoumarin OR Heparin\* OR Liquaemin OR Adomiparin OR Ardeparin OR Arteven OR Bemiparin\* OR Certoparin OR Clexane OR Klexane OR Clivarin\* OR Dalteparin OR Eparina OR Fluxum OR "Fragmin A" OR "Fragmin B" OR Fraxiparin OR Hepathrom OR "Lipo-hepin" OR Liquemin OR Multiparin OR Nadroparin\* OR Novoheparin OR Octaparin OR Pabyrin OR Parnaparin\* OR Parvoparin OR Pularin OR Reviparin OR Sandoparin OR Semuloparin OR Subeparin OR Sublingula OR Thromboliquine OR Tinzaparin\* OR Triofiban OR Vetren OR "Vitrum AB" OR UFH OR LMWH OR Alphaparin\* OR "Mono-Embolex" OR Enoxaparin\* OR Lovenox OR Danaparoid OR Danaproid OR Orgaran OR Lomoparan OR Fondaparinux OR Penta OR Quixidar OR Arixtra OR sulodexid\* OR Aterina OR Luzone OR "glucuronyl glucosamine glycan sulfate" OR "glucuronyl glucosaminoglycan sulfate" OR Dociparastat)

#2

TI=(COVID OR COVID19 OR "SARS-CoV-2" OR "SARS-CoV2" OR SARSCoV2 OR "SARSCoV-2" OR "SARS coronavirus 2" OR "2019 nCoV" OR "2019nCoV" OR "2019-novel CoV" OR "nCov 2019" OR "nCov 19" OR "severe acute respiratory syndrome coronavirus 2" OR "novel coronavirus disease" OR "novel corona virus disease" OR "corona virus disease 2019" OR "coronavirus disease 2019" OR "novel coronavirus pneumonia" OR "novel corona virus pneumonia" OR "severe acute respiratory syndrome coronavirus 2") OR AB=(COVID OR COVID19 OR "SARS-CoV-2" OR "SARS-CoV2" OR SARSCoV2 OR "SARSCoV-2" OR "SARS coronavirus 2" OR "2019 nCoV" OR "2019nCoV" OR "2019-novel CoV" OR "nCov 2019" OR "nCov 19" OR "severe acute respiratory syndrome coronavirus 2" OR "novel coronavirus disease" OR "novel corona virus disease" OR "corona virus disease 2019" OR "coronavirus disease 2019" OR "novel coronavirus pneumonia" OR "novel corona virus pneumonia" OR "severe acute respiratory syndrome coronavirus 2")

#3

TI=(random\* OR placebo OR trial OR groups OR "phase 3" OR "phase3" OR p3 OR "pIII") OR AB=(random\* OR placebo OR trial OR groups OR "phase 3" OR "phase3" OR p3 OR "pIII")

#4

#1 AND #2 AND #3

Indexes=SCI-EXPANDED, ESCI

= 471 references

## WHO COVID-19 Global literature on coronavirus disease

(<https://search.bvsalud.org/global-literature-on-novel-coronavirus-2019-ncov>)

Title, abstract, subject:

(anticoagula\* OR antithromb\* OR "Thrombin Inhibitor" OR "Thrombin Inhibitors" OR Dabigatran OR Pradaxa OR Argatroban OR Novastan OR Acova OR Lepirudin OR Refludan OR Desirudin OR Iprivask OR Revasc OR desulfatohirudin\* OR "recombinant HV1 hirudin" OR Bivalirudin OR Hirulog\* OR Angiomax OR Angiox OR "Xa inhibitor" OR "Xa inhibitors" OR Xaban\* OR Rivaroxaban OR Xarelto OR Apixaban OR Eliquis OR Edoxaban OR Lixiana OR Savaysa OR coumar\* OR cumar\* OR kumar\* OR Benzopyrone\* OR Benzopyran\* OR Hydroxycinnamic OR "Tonka bean camphor" OR "Vitamin K antagonist" OR "Vitamin K antagonists" OR phenprocoumon\* OR henylpropylhydroxycumarin\* OR Falithrom OR Fencumar OR Fenprocoumon\* OR Liquamar OR Marcoumar OR Marcumar OR Phenprogramma OR Warfarin\* OR Warfarat OR Aldocumar OR Warfant OR Brumolin OR Coumefene OR Dethmor OR Dethnel OR Kypfarin OR Marevan OR Panwarfin OR Prothromadin OR Tedicumar OR Zoocoumarin OR Heparin\* OR Liquaemin OR Adomiparin OR Ardeparin OR Arteven OR Bemiparin\* OR Certoparin OR Clexane OR Klexane OR Clivarin\* OR Dalteparin OR Eparina OR Fluxum OR "Fragmin A" OR "Fragmin B" OR Fraxiparin OR Hepathrom OR "Lipo-hepin" OR Liquemin OR Multiparin OR Nadroparin\* OR Novoheparin OR Octaparin OR Pabyrin OR Parnaparin\* OR Parvoparin OR Pularin OR Reviparin OR Sandoparin OR Semuloparin OR Subeparin OR Sublingula OR Thromboliquine OR Tinzaparin\* OR Triofiban OR Vetren OR "Vitrum AB" OR UFH OR LMWH OR Alphaparin\* OR "Mono-Embolex" OR Enoxaparin\* OR Lovenox OR Danaparoid OR Danaproid OR Orgaran OR Lomoparan OR Fondaparinux OR Penta OR Quixidar OR Arixtra OR sulodexid\* OR Aterina OR Luzone OR "glucuronyl glucosamine glycan sulfate" OR "glucuronyl glucosaminoglycan sulfate" OR Dociparastat) AND (random\* OR placebo OR trial OR groups OR "phase 3" OR "phase3" OR p3 OR "pIII")

→ excluding databases: MEDLINE, ICTRP, EMBASE, Scopus, PubMed, PMC, Web of Science

= 250 references

## ResearchSquare

(<https://www.researchsquare.com>)

Article type: Research Article

Abstract:

- anticoagulant = 35

- antithrombotic = 2

- thrombin = 2

= selected on website: 1 relevant reference
